# Supplementary material
Source: HighWire-hosted journal article supplement (http://www.cmaj.ca/highwire/filestream/58115/field_highwire_adjunct_files/0/develop-rush-f.pdf)
Supplement: develop-rush-f.pdf [file develop-rush-f.pdf]

## Recherche

## L'acquisition de preuves pour une médecine factuelle

## A. John Rush MD

Dans ce numéro du *JAMC*, Deshauer et ses collaborateurs<sup>1</sup> notent que la plupart des études (93 %) sur les antidépresseurs durent moins de 6 mois (en général de 6 à 8 semaines); en fait, la plupart sont réalisées par l'industrie à des fins d'homologation des produits. Malgré la perception répandue selon laquelle la dépression est un problème chronique ou récurrent, les études d'efficacité potentielle ou d'efficacité réelle à plus long-terme sont peu nombreuses et espacées dans le temps. Ainsi, si des patients nous interrogent sur les avantages et les inconvénients d'un traitement à plus long-terme, nous disposons de peu de preuves sur lesquelles fonder notre réponse.

Les études cliniques sont complexes, coûteuses et exigent beaucoup de temps. On peut *grosso modo* les diviser en études d'«efficacité potentielle» et études d'«efficacité réelle». Les premières sont, en général, conçues de manière à démontrer une validité interne plus concluante, ce qui fait en sorte que les différences entre les groupes traités sont entièrement attribuables au traitement étudié (p. ex., médicament v. placebo). Ces études recherchent typiquement un signe que le traitement est meilleur que le placebo et elles en confirment l'innocuité et la tolérabilité. Les études d'efficacité réelle (parfois appelées études pratiques ou de prise en charge) sont plus inclusives en termes de groupes de patients et font souvent appel aux traitements tels qu'ils sont prodigués dans la pratique courante plutôt que dans un contexte de recherche. Elles visent souvent à définir de quelle façon le traitement agit dans des conditions pratico-pratiques, mais elles peuvent aussi définir comment, à qui, quand et dans quel contexte un traitement doit être recommandé. Les études d'efficacité réelle incluent une évaluation vaste de l'efficacité sur le terrain, y compris des paramètres comme le fonctionnement au quotidien, la qualité de vie et l'utilisation des ressources en santé, tandis que les études d'efficacité s'attardent principalement aux symptômes.

En outre, les études d'efficacité potentielle de courte durée mettent l'accent sur des groupes définis et restreints de patients non hospitalisés, généralement recrutés parmi des volontaires qui présentent des symptômes de dépression et peu de comorbidités psychiatriques ou médicales générales (p. ex., troubles anxieux, toxicomanies, maladie cardiaque), le cas échéant<sup>2</sup>. Ces études excluent également en général les patients dont l'épisode de dépression majeure initial a duré plus de 2 ans et les patients qui n'ont pas répondu de façon satisfaisante à plus d'une tentative de traitement auparavant. En outre, souvent, l'application des interventions thérapeutiques dans la pratique de tous les jours diffère considérablement de celle qui a cours dans le cadre des études d'efficacité potentielle (p. ex., dans les études d'efficacité potentielle, les symptômes d'effets secondaires sont habituellement mesurés

## Points saillants

- Les résultats d'études de courte durée sur la dépression ont une portée minime pour la plupart des patients dépressifs dont la dépression est chronique ou récurrente.
- La majeure partie des études ne font que confirmer l'innocuité et l'efficacité des médicaments auprès de groupes restreints de patients et dans des conditions thérapeutiques atypiques.
- On ignore comment, quand et à qui recommander un traitement dans la pratique courante.
- Il faut recueillir des preuves cliniquement pertinentes pour orienter le processus décisionnel.

à chaque consultation, ce qui éclaire les décisions cliniques relatives à la posologie, et les consultations sont souvent plus longues et plus fréquentes). En dernier lieu, les études d'efficacité potentielle de courte durée établissent souvent des paramètres susceptibles de mettre au jour des «signes» d'efficacité (p. ex., changement d'intensité des symptômes sur une période de 8 semaines), bien que récemment, ces études aient également commencé à faire état de paramètres cliniquement pertinents, comme la réponse au traitement ou la rémission. La réponse au traitement fait référence à un degré cliniquement significatif d'amélioration (p. ex., une réduction de 50 % de l'intensité des symptômes de dépression) et la rémission fait pour sa part référence à une quasi-absence de symptômes. Comme paramètre, on préfère la rémission, plus valide et pertinente sur le plan clinique, parce qu'elle est associée à un retour au fonctionnement normal<sup>3</sup> et à un meilleur pronostic comparativement à la réponse au traitement<sup>4,5</sup>.

Bien que ces études d'efficacité de courte durée soient une première étape essentielle, elles fournissent peu de renseignements pour éclairer les décisions des médecins ou des patients. Par exemple, nous manquons de données sur lesquelles baser la sélection des patients les plus susceptibles de bénéficier d'un traitement particulier ou la durée souhaitée de l'essai d'un médicament permettant de conclure s'il agit ou non, si le bienfait maximum a été obtenu ou encore, si un traitement à plus long-terme s'impose et le cas échéant, pour quels patients.

Un troisième type d'études, les études dites hybrides, tentent d'exercer un contrôle sur certains paramètres qui affectent le pronostic tout en permettant à d'autres de varier. Par exemple, l'étude STAR\*D (pour *Sequenced Treatment Alternatives*

John Rush est attaché aux départements de sciences cliniques et de psychiatrie du University of Texas Southwestern Medical Center at Dallas à Dallas, au Texas

to Relieve Depression)<sup>6-8</sup> a regroupé une grande diversité de patients souffrant de dépression recrutés auprès de diverses pratiques afin d'améliorer la généralisabilité des conclusions. Cette étude incluait plusieurs paramètres (p. ex., symptômes, fonctionnement, utilisation des ressources en santé) et incluait des traitements d'usage courant. À cet égard, il s'agissait d'une étude d'efficacité réelle. D'autre part, les chercheurs ont vérifié la qualité du traitement (c.-à-d., de quelle manière il était administré) afin de s'assurer qu'en cas d'échec thérapeutique, ce dernier puisse être attribuable au traitement lui-même et non à la piètre administration d'un agent par ailleurs efficace. À cet égard, l'étude comporte certains éléments d'une étude d'efficacité potentielle, bien que le traitement ait été administré dans le cadre de la pratique concrète et non dans des centres consacrés à la recherche clinique. La randomisation (répartition aléatoire) a été utilisée pour déterminer parmi les quelques traitements envisageables pour une étape ultérieure, lequel serait le meilleur après l'échec d'un premier traitement ou de plusieurs traitements successifs<sup>5,7,9-12</sup>.

Les résultats de l'étude STAR\*D rappellent les conclusions de Deshauer et ses collaborateurs. Notamment les études de courte durée (de 6 à 8 semaines) sont trop brèves pour évaluer la proportion entière des patients dont les symptômes répondront au traitement ou qui entreront en rémission<sup>6-8</sup>. Au moins 50 % des patients qui ont obtenu une rémission y sont arrivés après 6 semaines de monothérapie; environ 33 % n'ont même pas répondu au traitement après 6 semaines<sup>8</sup>. Concordant avec la synthèse de Deshauer et ses collaborateurs, les issues thérapeutiques à plus long-terme ont été moins probantes que les résultats à court terme, surtout chez les patients qui avaient connu un plus grand nombre d'échecs avec des monothérapies<sup>9</sup> ou qui présentaient certaines comorbidités psychiatriques ou médicales générales (données non publiées).

Les études d'efficacité réelle, ou études hybrides, sont souvent englobées dans la notion de «recherche translationnelle T<sub>2</sub>». Ce type de recherche mesure l'innocuité et l'efficacité du traitement dans la pratique concrète et répond à des questions relatives à l'application et à l'utilisation optimum des traitements : à qui (p. ex., chez quels patients selon les comorbidités, les «sous-types» de dépression, l'âge, le sexe), quand (p. ex., durant la maladie ou dans une séquence d'étapes thérapeutiques), comment (p. ex., posologie, durée, réglage posologique), pendant combien de temps le traitement devrait-il être utilisé et à quelles fins sur les plans des avantages et des coûts<sup>13</sup>? De son côté, la «recherche translationnelle T<sub>1</sub>» repose sur l'obtention et l'application de résultats en sciences fondamentales dans le but d'approfondir notre compréhension de la pathobiologie de la maladie et de développer des traitements candidats adaptés aux nouvelles avenues pathobiologiques découvertes<sup>13</sup>.

La synthèse de Deshauer et ses collaborateurs rappelle le fait qu'après la réalisation d'études pour l'homologation des médicaments, de nombreuses questions cliniques cruciales restent sans réponse, ce qui confirme le manque de preuves tirées de recherches translationnelles T<sub>2</sub>. Ces questions incluent : Chez quels patients faut-il privilégier le traitement? Le traitement est-il sûr et efficace chez les patients atteints de di-

verses autres comorbidités? L'agent peut-il être associé à d'autres antidépresseurs chez des sujets qui manifestent une réponse partielle? Combien de temps doit-on l'essayer avant de déterminer s'il agira pleinement ou si d'autres traitements seront requis? Le médicament est-il efficace en seconde ou troisième étape? Et, plus important encore, le médicament est-il efficace à plus long-terme (au-delà de 6 mois) si l'on tient compte des paramètres cliniques importants que sont par exemple le fonctionnement, la qualité de vie, le rendement au travail et l'utilisation des ressources en soins de santé.

Pour répondre à ces questions de recherche T<sub>2</sub>, il faut assembler d'importantes cohortes de patients représentatifs à qui on prodiguerait des soins typiques ou réalistes, mais de grande qualité (soins «paramétrés»<sup>8,14</sup>) à plus long-terme (au moins 6 mois); cela doterait ces études d'une puissance statistique suffisante et permettrait la généralisabilité de leurs conclusions et la réalisation d'analyses modératrices susceptibles d'éclairer les décisions cliniques<sup>15-17</sup>. Les analyses modératrices permettent de reconnaître les patients les mieux servis par un traitement à plus long-terme sur la base des variables qui importent aux médecins, aux patients et autres intervenants (p. ex., rémission soutenue, fonctionnement, qualité de vie et rendement au travail). À ces fins, les études cliniques pratiques proposent une approche économique, permettent de recruter des populations de patients suffisantes et, compte tenu qu'elles sont très inclusives, elles permettent aussi de déterminer, grâce aux analyses modératrices, quels sous-groupes spécifiques risquent de bénéficier le plus du traitement<sup>18</sup>. Les systèmes de santé opérant au moyen de dossiers médicaux électroniques partagés sont propices à la réalisation d'études cliniques pratiques. De telles études offrent également la possibilité de procéder à des analyses à l'échelle du génome ou d'autres biomarqueurs qui pourraient nous aider à mieux assortir les patients et les traitements.

Il est particulièrement important de reconnaître les groupes de patients chez lesquels le traitement n'est ni efficace ni sécuritaire. La synthèse de Deshauer et ses collaborateurs donne à penser que les patients atteints de dépression qui présentent certains types de comorbidités médicales générales pourraient ne pas tirer profit d'un traitement à plus long-terme. Si cela s'avère, non seulement ces patients pourraient s'éviter un traitement inefficace, fastidieux et coûteux, mais les chercheurs pourraient alors se consacrer à expliquer le phénomène et tenter de mettre au point de meilleurs traitements pour ces patients.

On ne peut pas raisonnablement faire porter à l'industrie l'entière responsabilité de définir en quoi, quand, pour qui et dans quel contexte les traitements offerts sont préférables et de déterminer le degré d'innocuité et d'efficacité des nouveaux agents dans la pratique réelle (recherches T<sub>2</sub>). Pourquoi? Parce que de telles recherches risqueraient de restreindre l'utilisation d'un nouveau médicament ou de générer des données dont pourrait se servir la concurrence dans sa mise en marché. En toute logique, les sociétés veulent exercer un contrôle sur leurs protocoles d'études afin de protéger leurs produits. Et qui les en blâmerait? En effet, même si ces études sont rigoureusement conçues et réalisées, un doute

peut demeurer quant à leurs résultats, compte tenu de la source du financement.

Nous avons besoin de sources indépendantes de financement (p. ex., gouvernements et fondations) pour fonder nos pratiques de médecine factuelle sur des preuves concrètes. Il nous faut des études concluantes et généralisables, regroupant des «patients réels», à qui le traitement est administré dans des conditions cliniques réalistes et qui reposent sur des données de registres et des protocoles à répartition aléatoire pour nous informer sur la sécurité des patients, obtenir des preuves sur lesquelles fonder nos décisions cliniques et améliorer l'issue des traitements. Faute de telles études, la prise de décision clinique continuera de relever de «l'art de la médecine» plutôt que la science, comme elle le devrait.

**Conflits d'intérêts déclarés :** John Rush a reçu des subventions de recherche du National Institute of Mental Health, de la Fondation Robert Wood Johnson et du Stanley Medical Research Institute. Il a fait partie de comités consultatifs, il a agi à titre d'expert-conseil auprès d'Advanced Neuromodulation Systems, Inc., AstraZeneca, Best Practice Project Management, Inc., Bristol-Myers Squibb Company, Cyberonics, Inc., Eli Lilly and Company, Gerson Lehman Group, GlaxoSmithKline, Jazz Pharmaceuticals, Magellan Health Services, Merck & Co., Inc., Neuronetics, Ono Pharmaceutical, Organon USA Inc., PamLab, Personality Disorder Research Corp., Pfizer Inc., The Urban Institute et Wyeth-Ayerst Laboratories Inc. Il a fait partie de la banque de conférenciers de Cyberonics, Inc., Forest Pharmaceuticals, Inc. et GlaxoSmithKline. Il détient également des actions (à l'exclusion de fonds mutuels et de fonds fiduciaires sans droit de regard) de Pfizer Inc. et reçoit des revenus de redevance de Guilford Publications et Healthcare Technology Systems, Inc.

## RÉFÉRENCES

- Deshauer D, Moher D, Fergusson D et coll., Selective serotonin reuptake inhibitors for unipolar depression: a systematic review of classic long-term randomized controlled trials. *CMAJ* 2008;178:1293-301.
- Depression Guideline Panel. *Clinical practice guideline, number 5: depression in primary care. Volume 2. Treatment of major depression.* Rockville (MD): US Department of Health and Human Services, Public Health Service, Agency for Health Care Policy and Research; 1993.
- Miller IW, Keitner GI, Schatzberg AF et coll., The treatment of chronic depression, part 3: psychosocial functioning before and after treatment with sertraline or imipramine. *J Clin Psychiatry* 1998;59:608-19.
- Rush AJ, Kraemer HC, Sackeim HA et coll., Report by the ACNP Task Force on Response and Remission in Major Depressive Disorder. *Neuropsychopharmacology* 2006;31:1841-53.
- Rush AJ, Trivedi MH, Wisniewski SR et coll., Acute and longer-term outcomes in depressed outpatients requiring one or several treatment steps: a STAR\*D report. *Am J Psychiatry* 2006;163:1905-17.
- Koran LM, Gelenberg AJ, Kornstein SG et coll., Sertraline versus imipramine to prevent relapse in chronic depression. *J Affect Disord* 2001;65:27-36.
- Rush AJ, Trivedi MH, Wisniewski SR et coll., Bupropion-SR, sertraline, or venlafaxine-XR after failure of SSRIs for depression. *N Engl J Med* 2006;354:1231-42.
- Trivedi MH, Rush AJ, Wisniewski SR et coll., Evaluation of outcomes with citalopram for depression using measurement-based care in STAR\*D: implications for clinical practice. *Am J Psychiatry* 2006;163:28-40.
- Trivedi MH, Fava M, Wisniewski SR et coll., Medication augmentation after the failure of SSRIs for depression. *N Engl J Med* 2006;354:1243-52.
- Fava M, Rush AJ, Wisniewski SR et coll., A comparison of mirtazapine and nortriptyline following two consecutive failed medication treatments for depressed outpatients: a STAR\*D report. *Am J Psychiatry* 2006;163:1161-72.
- McGrath PJ, Stewart JW, Fava M et coll., Tranylcypromine versus venlafaxine plus mirtazapine following three failed antidepressant medication trials for depression: a STAR\*D report. *Am J Psychiatry* 2006;163:1531-41.
- Nierenberg AA, Fava M, Trivedi MH et coll., A comparison of lithium and T3 augmentation following two failed medication treatments for depression: a STAR\*D report. *Am J Psychiatry* 2006;163:1519-30.
- Woolf SH. The meaning of translational research and why it matters. *JAMA* 2008;299:211-3.
- Trivedi MH, Rush AJ, Gaynes BN et coll., Maximizing the adequacy of medication treatment in controlled trials and clinical practice: STAR\*D measurement-based care. *Neuropsychopharmacology* 2007;32:2479-89.
- Kraemer HC, Stice E, Kazdin A et coll., How do risk factors work together? Mediators, moderators, and independent, overlapping, and proxy risk factors. *Am J Psychiatry* 2001;158:848-56.
- Kraemer HC, Wilson GT, Fairburn CG et coll., Mediators and moderators of treatment effects in randomized clinical trials. *Arch Gen Psychiatry* 2002;59:877-83.
- Kraemer HC, Frank E, Kupfer DJ. Moderators of treatment outcomes: clinical, research, and policy importance. *JAMA* 2006;296:1286-9.
- Tunis SR, Stryer DB, Clancy CM. Practical clinical trials: increasing the value of clinical research for decision making in clinical and health policy. *JAMA* 2003;290:1624-32.

**Adresser toute correspondance à :** Dr A. John Rush, Department of Clinical Sciences, University of Texas Southwestern Medical Center at Dallas, 5323 Harry Hines Blvd., Dallas TX 75390-9066, USA; télécopieur: 214 648-6863; john.rush@utsouthwestern.edu
